# Supplementary material for: Rat Aquaporin-5 Is pH-Gated Induced by Phosphorylation and Is Implicated in Oxidative Stress
Source: Int J Mol Sci. 2016 Dec 13;17(12):2090. doi: 10.3390/ijms17122090 (PMC5187890; doi:10.3390/ijms17122090)
Supplement: Supplementary file 1 [file ijms-17-02090-s001.pdf]

# Supplementary Materials: Rat Aquaporin-5 Is pH-Gated Induced by Phosphorylation and Is Implicated in Oxidative Stress

Claudia Rodrigues, Andreia Filipa Mósca, Ana Paula Martins, Tatiana Nobre, Catarina Prista, Fernando Antunes, Ana Cipak Gasparovic and Graça Soveral

|              |                                                             |
|--------------|-------------------------------------------------------------|
|              | ..... ..... ..... ..... ..... ..... ..... ..... ..... ..... |
|              | 10 20 30 40 50                                              |
| <b>rAQP5</b> | MKKEVCSLAF FKAVFAEFLA TLIFVFFGLG SALKWPSALP TILQISIAFG      |
| <b>hAQP5</b> | MKKEVCSVAF LKAVFAEFLA TLIFVFFGLG SALKWPSALP TILQIALAFG      |
|              | *****; ** :***** ***** ***** ***** *****; **                |
|              | ..... ..... ..... ..... ..... ..... ..... ..... ..... ..... |
|              | 60 70 80 90 100                                             |
| <b>rAQP5</b> | LAIGTLAQAL GPVSGGHINP AITLALLIGN QISLLRAVFY VAAQLVGAIA      |
| <b>hAQP5</b> | LAIGTLAQAL GPVSGGHINP AITLALLVGN QISLLRAFFY VAAQLVGAIA      |
|              | ***** ***** *****; ** *****; ** *****                       |
|              | ..... ..... ..... ..... ..... ..... ..... ..... ..... ..... |
|              | 110 120 130 140 150                                         |
| <b>rAQP5</b> | GAGILYWLAP LNARGNLAVN ALNNNTTPGK AMVVELILTF QLALCIFSSST     |
| <b>hAQP5</b> | GAGILYGVAP LNARGNLAVN ALNNNTTQGQ AMVVELILTF QLALCIFAST      |
|              | *****; ** ***** ***** *; ***** *****; **                    |
|              | ..... ..... ..... ..... ..... ..... ..... ..... ..... ..... |
|              | 160 170 180 190 200                                         |
| <b>rAQP5</b> | DSRRTSPVGS PALSIGLSVT LGHLVGIYFT GCSMNPARSF GPAVVMNRFSS     |
| <b>hAQP5</b> | DSRRTSPVGS PALSIGLSVT LGHLVGIYFT GCSMNPARSF GPAVVMNRFSS     |
|              | ***** ***** ***** ***** *****                               |
|              | ..... ..... ..... ..... ..... ..... ..... ..... ..... ..... |
|              | 210 220 230 240 250                                         |
| <b>rAQP5</b> | PSHWVFWVGP IVGAMLAAAIL YFYLLFPSSL SLHDRVAVVK GTYPEEDWE      |
| <b>hAQP5</b> | PAHWVFWVGP IVGAVLAAAIL YFYLLFPNSL SLSERVAIIK GTYPEDEDWE     |
|              | *; ***** *****; ***** *****; ** **; **; : * *****; *****    |
|              | ..... ..... .....                                           |
|              | 260                                                         |
| <b>rAQP5</b> | DHREERKKTI ELTAH                                            |
| <b>hAQP5</b> | EQREERKKTI ELTTR                                            |
|              | :; *****; ***; ;                                            |

**Figure S1.** Sequence alignment of the full-length amino acid sequences of *Rattus norvegicus* AQP5 and human AQP5. The alignment was generated with CLUSTAL W (using BioEdit software). The amount of conservation of each amino acid is represented by symbols ('\*', exact match in all sequences; ':', conserved substitution; '.', semi-conserved substitution). The two conserved NPA signature motifs are underlined. Ser152, S156, Ser231, Ser233, Thr242, Thr259 and Thr263 (colored green) are consensus phosphorylation sites of hAQP5; His173 and Ser183 (colored yellow) are the residues involved in the switch between narrow and wide conformations in the gating mechanism of human AQP5 proposed by Janosi et al. (doi:10.1371/journal.pone.0059897).
